# Supplementary material
Source: publisher figshare collection journal article supplement (https://sage.figshare.com/ndownloader/files/16214537)
Supplement: Supplementary file 1 [file 16214537]

Archive with 4 entries (3 files):
- JCR-17-0164.R1/
- JCR-17-0164.R1/Appendix (3).pdf
- JCR-17-0164.R1/johansson_hultman_jcr.do
- JCR-17-0164.R1/johansson_hultman_jcr.dta
